# Supplementary material for: DNA deformability defines sequence-dependent capture of E. coli gyrase
Source: Research Square preprint supplement (doi:10.21203/rs.3.rs-7265879/v1), 2025-08-18

Demo dataset and expected output.

Demo sequence same: “mc336”

Demo sequence:

"TTTATACTAACTTGAGCGAAACGGGAAGGGTTTTCACCGATATCACCGAAACGCGCGAGGCAGCTGTATGGCATGAAAGAGTTCTTCCCGGAAAACGCGGTGGAATATTTCGTTTCCTACTACGACTACTATCAGCCGGAAGCCTATGTACCGAGTTCCGACACTTTCATTGAGAAAGATGCCTCAGCTCTGTTACAGGTCACTAATACCATCTAAGTAGTTGATTCATAGTGACTGCATATGTTGTGTTTTACAGTATTATGTAGTCTGTTTTTTATGCAAAATCTAATTTAATATATTGATATTTATATCATTTTACGTTTCTCGTTCAGCTTT"

Example Output Case 1:

Individual Base Pair Step Deformability Values Bar Plot.


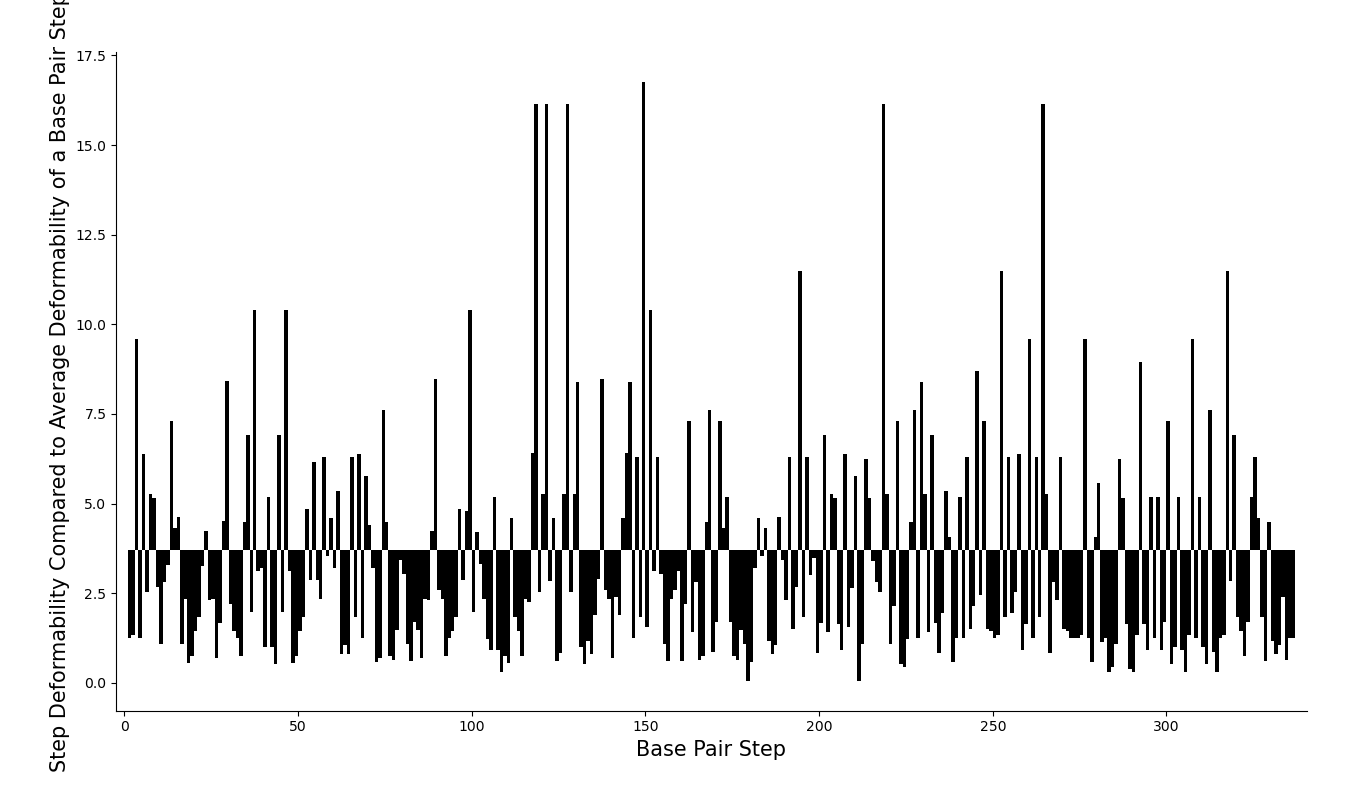


Example Output Case 2:

35-mer deformability score circular heatmap with bases 160–250 labeled with red.


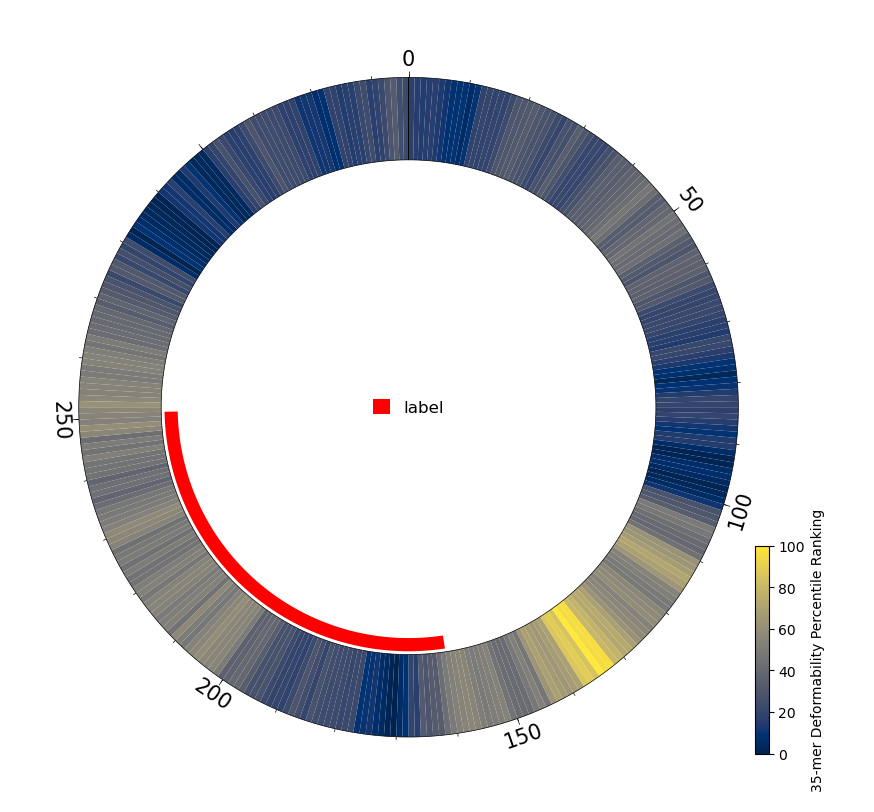

Supplement: Supplementary file 1 [file Bakeretal.sample_dataset.docx]
